# Supplementary material
Source: PubMed Central journal article supplement (PMC2756559)
Supplement: mmc1.pdf [file mmc1.pdf]

## Supplemental Data

*AJHG*, Volume 85

# A Homozygous Nonsense Mutation in the Human Desmocollin-3 (*DSC3*) Gene Underlies Hereditary Hypotrichosis and Recurrent Skin Vesicles

Muhammad Ayub, Sulman Basit, Musharraf Jelani, Fazal Ur Rehman, Muhammad Iqbal, Masoom Yasinzai, and Wasim Ahmad

Table S1. Sequences of the Primers Used in Screening the *DSC3* Gene

| Exon No. | PRIMER (5'→3')        |                        | Product Size<br>*(bp) | Annealing<br>Temp (°C) |
|----------|-----------------------|------------------------|-----------------------|------------------------|
|          | Forward               | Reverse                |                       |                        |
| 1        | TCAGAAGTGAAGTTGCTCCC  | TTTTCTCTCCTCACTCCTGC   | 404                   | 57                     |
| 2/3      | TGTTGGACTTTGTCAGTTGC  | ATTCAAATCTGTCCCAGGTG   | 430                   | 57                     |
| 4        | GATTGGCTTATTCATCCCAC  | GGGGAAAATACCCTATTTATCC | 412                   | 59                     |
| 5        | AGCATGGAAATGCCTGACAC  | ATGGCTTTAGGGCCTTTCTC   | 431                   | 57                     |
| 6        | CTGTGAGAATCCCTGTTTGC  | TCCATTGACTCTAAGATACC   | 453                   | 57                     |
| 7        | AAGTGTTTCTCCATTTGGTGC | GGCCTTGAGTATAAAAAGCTC  | 398                   | 57                     |
| 8        | CCTCTTCAGTCCTATCTAAAG | AGTCCTTATGGCTACTCTAAC  | 517                   | 55                     |
| 9        | CAGGTAAGACACGGAAACAC  | ATGAAGACTCATGGTACTGGC  | 483                   | 55                     |
| 10       | CTGTCAAAGGCCAGTACCATG | CCAAGTTGTAGAGTCTATGGTC | 502                   | 57                     |
| 11       | AGAATTTATGCAGCACTGGTC | ATCCAACCTTTAGGATCATGC  | 503                   | 56                     |
| 12       | AGTGGGGTCAAAGATCAACG  | AAACACGGCTTCTTGTACCC   | 501                   | 57                     |
| 13       | GTCATTTCAAATTAGCTGCAG | TCATGCTTTGTGTAAGTAAGC  | 493                   | 58                     |
| 14       | GGCAGTTCCTTGAGAATGAC  | ATCTGATGGATGCTTGGACG   | 429                   | 57                     |
| 15       | ATGGGAAACCATGCTTAGTG  | TTGACAGACAATATCTATGCC  | 381                   | 57                     |
| 16       | TGAATGAAGACAGTATCTGGG | CTATTTTCTCCATTCGGAGG   | 486                   | 57                     |
| 17       | TTGACTCACAACCAAGGCTG  | ATGGCATGCGGCTTCATTC    | 419                   | 53                     |

\*base pair
